1  
2  
3  
4  
5  
6  
7  
8  
9  
10  
11  
12  
13  
14  
15  
16  
17  
18  
19

**WWOX-Mediated Degradation of AMOTp130 Negatively Affects Egress of  
Filovirus VP40 VLPs**

Jingjing Liang<sup>1</sup>, Gordon Ruthel<sup>1</sup>, Bruce D. Freedman<sup>1</sup>, and Ronald N. Harty<sup>1\*</sup>

<sup>1</sup>Department of Pathobiology, School of Veterinary Medicine, University of  
Pennsylvania, 3800 Spruce Street, Philadelphia, PA 19104, USA.

**\*Corresponding Author:** Dr. Ronald N. Harty, Professor, Department of Pathobiology,  
School of Veterinary Medicine, University of Pennsylvania, 3800 Spruce Street,  
Philadelphia, PA 19104, USA. Phone: 215-573-4485, Fax: 215-898-7887, Email:  
[rharty@vet.upenn.edu](mailto:rharty@vet.upenn.edu)

**Keywords:** Ebola, Marburg, WWOX, Angiomotin (AMOT), VLP budding, VP40, filovirus,  
PPxY motif, L-domain

20 **ABSTRACT**

21 Ebola (EBOV) and Marburg (MARV) viruses continue to emerge and cause severe  
22 hemorrhagic disease in humans. A comprehensive understanding of the filovirus-host  
23 interplay will be crucial for identifying and developing antiviral strategies. The filoviral  
24 VP40 matrix protein drives virion assembly and egress, in part by recruiting specific WW-  
25 domain-containing host interactors via its conserved PPxY Late (L) domain motif to  
26 positively regulate virus egress and spread. In contrast to these positive regulators of  
27 virus budding, a growing list of WW-domain-containing interactors that negatively regulate  
28 virus egress and spread have been identified, including BAG3, YAP/TAZ and WWOX. In  
29 addition to host WW-domain regulators of virus budding, host PPxY-containing proteins  
30 also contribute to regulating this late stage of filovirus replication. For example,  
31 angiomin (AMOT) is a multi-PPxY-containing host protein that functionally interacts with  
32 many of the same WW-domain-containing proteins that regulate virus egress and spread.  
33 In this report, we demonstrate that host WWOX, which negatively regulates egress of  
34 VP40 VLPs and recombinant VSV-M40 virus, interacts with and suppresses the  
35 expression of AMOT. We found that WWOX disrupts AMOT's scaffold-like tubular  
36 distribution and reduces AMOT localization at the plasma membrane via lysosomal  
37 degradation. In sum, our findings reveal an indirect and novel mechanism by which  
38 modular PPxY/WW-domain interactions between AMOT and WWOX regulate PPxY-  
39 mediated egress of filovirus VP40 VLPs. A better understanding of this modular network  
40 and competitive nature of protein-protein interactions will help to identify new antiviral  
41 targets and therapeutic strategies.

42

## 43 **IMPORTANCE**

44 Filoviruses (Ebola [EBOV] and Marburg [MARV]) are zoonotic, emerging pathogens that  
45 cause outbreaks of severe hemorrhagic fever in humans. A fundamental understanding  
46 of the virus-host interface is critical for understanding the biology of these viruses and for  
47 developing future strategies for therapeutic intervention. Here, we reveal a novel  
48 mechanism by which host proteins WWOX and AMOTp130 interact with each other and  
49 with the EBOV matrix protein VP40 to regulate VP40-mediated egress of virus like  
50 particles (VLPs). Our results highlight the biological impact of competitive interplay of  
51 modular virus-host interactions on both the virus lifecycle and the host cell.

52

## 53 **INTRODUCTION**

54 Ebola (EBOV) and Marburg (MARV) viruses are emerging pathogens that can cause  
55 severe hemorrhagic disease in humans, and these emerging pathogens remain a global  
56 public health threat that warrant urgent development of antiviral therapeutics (1-3).  
57 Toward this end, a more in-depth understanding of the interplay between the host and  
58 EBOV/MARV proteins would be beneficial both for our understanding of the fundamental  
59 molecular mechanisms of the virus lifecycle, and for identifying new targets and strategies  
60 for antiviral development.

61 Our focus is on the filovirus VP40 protein, which is the major structural protein that  
62 drives virion assembly and egress. Expression of VP40 alone is sufficient for the  
63 formation and egress of virus-like particles (VLPs) that mimic the morphology of authentic  
64 virus particles (4-10). In our investigations of the VP40/host interactome, we identified a  
65 series of specific host interactors that either positively or negatively regulated the budding

66 process (11-17). These host proteins contain one or more modular WW-domains that  
67 interacted with the conserved PPxY Late (L) domain motif at the N-termini of both EBOV  
68 VP40 (eVP40) and MARV VP40 (mVP40). The PPxY L-domain plays a key role in  
69 promoting efficient release of VLPs and live virus, in part, by hijacking or recruiting host  
70 factors that enhance VLP or virus egress from the plasma membrane (18). For example,  
71 the VP40 PPxY motif interacts with several members of the HECT family of E3 ubiquitin  
72 ligases, such as Nedd4, Itch, WWP1, and Smurf2 which facilitate mono-ubiquitination of  
73 VP40 and subsequent engagement and re-localization of the host ESCRT machinery to  
74 the site of virus budding at the plasma membrane to enhance virus-cell separation and  
75 release of VLPs or infectious virus (8, 11, 16, 17). In contrast to these positive regulators  
76 of virus budding, we have identified more recently a growing list of novel WW-domain  
77 interactors that negatively regulate egress, such as host proteins BAG3, YAP/TAZ, and  
78 WWOX (12, 13, 15). Notably, these negative regulators of budding are multifunctional  
79 proteins that regulate diverse pathways/processes in the cell including,  
80 apoptosis/autophagy, transcription, cytoskeletal dynamics, cell migration/morphology,  
81 and tight junction formation (19-24). Moreover, regulation of these diverse pathways by  
82 WW-domain containing BAG3, YAP/TAZ, and WWOX is achieved, in part, via their  
83 interactions with host PPxY-containing proteins, such as angiomin (AMOT) (25-30).  
84 Notably, AMOT contains three N-terminal PPxY motifs, two of which are identical to that  
85 in eVP40. Thus, we speculated that the modular mimicry of the viral and host PPxY motifs  
86 could lead to competitive interactions with host WW-domain containing proteins resulting  
87 in meaningful biological consequences for both the virus and the host. Indeed, we recently  
88 demonstrated that expression of AMOT had a positive influence on egress of both VP40

89 VLPs and live EBOV and MARV by counteracting the negative effects of YAP and WWOX  
90 (12, 13, 31).

91 In this report, we investigated further the interplay among AMOT, WWOX, and  
92 eVP40/mVP40 to understand the molecular mechanism by which these host proteins and  
93 modular interactions regulate budding. Our results revealed that WWOX interacts with  
94 and regulates expression and intracellular distribution of AMOT, and that this interplay  
95 between AMOT and WWOX contributes mechanistically to the efficiency of VP40 VLP  
96 egress. Specifically, we found that expression of WWOX reduced the levels of AMOT in  
97 the cytoplasm and at the plasma membrane, as well as modified the intracellular  
98 localization of AMOT, and that these changes in AMOT expression and localization  
99 correlated with a decrease in VP40 VLP egress. Moreover, expression of WWOX led to  
100 lysosomal degradation of AMOT and a concomitant decrease in VP40 VLP egress. In  
101 sum, these data highlight a novel, complex network of modular PPxY/WW-domain  
102 interactions that may impact both the host and the late stages of filovirus egress and  
103 spread.

104

## 105 **RESULTS**

### 106 **WWOX interacts with and reduces AMOTp130 expression levels.**

107 We demonstrated previously that expression of full-length, endogenous AMOT  
108 (AMOTp130) was important for the efficient egress of both VP40 VLPs and for live  
109 infectious EBOV and MARV, whereas expression of WWOX inhibited egress of VP40  
110 VLPs from HEK293T cells. In light of the contrasting roles for PPxY-containing  
111 AMOTp130 and WW-domain containing WWOX in regulating VP40-mediated egress, we

112 first sought to determine whether WWOX and AMOTp130 interact. Toward this end, we  
113 transfected HEK293T cells with expression plasmids for WWOX (myc-tagged) and  
114 AMOTp130 (HA-tagged) and used an IP/Western approach to demonstrate a strong  
115 interaction between the two exogenously expressed proteins (Fig. 1A). In addition, we  
116 used the same approach to demonstrate that exogenously expressed WWOX interacted  
117 with endogenous AMOTp130 (Fig. 1B).

118 Next, we asked whether transfecting HEK293T cells with increasing amounts of  
119 WWOX plasmid would affect expression levels of AMOTp130 (Fig. 1C). Intriguingly, we  
120 observed a dose-dependent decrease in the levels of AMOTp130 as the amount of  
121 transfected WWOX plasmid was increased (Figs. 1C and 1D). Notably, WWOX  
122 expression did not reduce the level of exogenously expressed AMOTp80; an N-terminally  
123 deleted isoform of AMOTp130 that lacks all of the PPxY motifs. Together, these data  
124 show that WWOX interacts with AMOTp130 and that increased expression of WWOX  
125 leads to a dose-dependent decrease in AMOTp130 levels in HEK293T cells.

126

127 **The PPxY/WW-domain interplay is important for the AMOTp130/WWOX interaction**  
128 **and reduced expression of AMOTp130.**

129 Here, we sought to more precisely identify the regions of AMOTp130 and WWOX that  
130 are critical for mediating this interaction. Briefly, HEK293T cells were transfected with WT  
131 WWOX and WT AMOTp130 (Fig. 2A), single PPxY (PY) motif mutants PY1, PY2 or PY3  
132 (Fig. 2B), or with triple PY motif mutant PY123 (Fig. 2C), and an IP/Western blot assay  
133 was utilized to detect an interaction. Not surprisingly, the AMOTp130-PY123 triple mutant  
134 was unable to bind to WWOX and was undetectable on the gel (Fig. 2C, lane 2). In

135 contrast, the single PY mutants of AMOTp130 showed varying degrees of binding to  
136 WWOX (Fig. 2B). We observed that mutant PY1 was essentially unable to interact with  
137 WWOX (Fig. 2B, lane 4), whereas both mutants PY2 and PY3 showed some degree of  
138 binding to WWOX, albeit significantly less than WT AMOTp130 (Fig. 2B, lanes 5 and 6,  
139 compare with Fig. 2A, lane 2). These data suggest that all three PY motifs of AMOTp130  
140 participate in binding to WWOX, with PY motif #1 being most important for an efficient  
141 interaction.

142 Next, we wanted to ask whether increased expression of WWOX would lead to reduced  
143 levels of expression of the PY mutants of AMOTp130, as we observed for WT AMOTp130  
144 (Figs. 1C + 1D). Briefly, HEK293T cells were co-transfected with the indicated  
145 combinations of plasmids, and protein levels were quantified by Western blotting (Figs.  
146 2D-F). While increased expression of WWOX once again resulted in reduced levels of  
147 WT AMOTp130 (Fig. 2D, lanes 1-3), increased expression of WWOX had no effect on  
148 expression of the AMOTp130-PY123 triple mutant in repeated experiments (Fig. 2D,  
149 lanes 4-6; Fig. 2F). This finding strongly suggests that the PPxY-mediated interaction  
150 between AMOTp130 and WWOX is essential for the observed reduction in AMOTp130  
151 expression. For the individual PY mutants, we found that increased expression of WWOX  
152 also had no significant effect on expression levels of PY1 (Fig. 2E, lanes 4-6; Fig. 2F),  
153 which correlates well with our finding that PY motif #1 is likely most critical for mediating  
154 a strong interaction with WWOX (Fig. 2B). Increased expression of WWOX had a modest  
155 effect on reducing the levels of expression of mutants PY2 and PY3 in repeated  
156 experiments (Fig. 2E, lanes 7-12; Fig. 2F).

157       Next, we wanted to interrogate the WW-domains of WWOX for their role in interacting  
158 with AMOTp130 and in reducing expression levels of AMOTp130 in HEK293T cells. We  
159 focused our analysis of WW-domain #1 (WW1) of WWOX, since this domain was first  
160 identified as the interacting domain with the VP40 PPxY motif and since WW-domain #2  
161 (WW2) of WWOX is atypical in its amino acid sequence(32). Briefly, we generated a  
162 series of WW1 mutations including single point mutant Y33R, double point mutant  
163 W44A/P47A, triple point mutant Y33R/W44A/P47A, and deletion mutant  $\Delta$ WW. We  
164 observed that each of the WW1 domain mutants of WWOX were reduced significantly in  
165 their ability to interact with AMOTp130 as determined by IP/Western analysis (Fig. 3A).  
166 In addition, we observed an approximate 2.5-fold and 5-fold reduction in the expression  
167 level of AMOTp130 in the presence of double mutant W44A/P47A and single mutant  
168 Y33R, respectively compared to control (Fig. 3B, lanes 3 and 4; Fig. 3C). Co-expression  
169 of mutants Y33R/W44A/P47A and  $\Delta$ WW resulted in a <2-fold reduction in AMOTp130  
170 expression compared to control (Fig. 3B, lanes 5 and 6; Fig. 3C). Thus, the more subtle  
171 mutants (Y33R and W44A/P47A) resulted in a more significant decrease in expression of  
172 AMOTp130 than that observed with the more severe mutants (Y33R/W44A/P47A, and  
173 deletion mutant  $\Delta$ WW) of WWOX. Taken together, these results suggest that the  
174 PPxY/WW-domain interplay between AMOTp130 and WWOX is critical for their ability to  
175 physically interact, and plays a contributing role in the mechanism by which WWOX  
176 reduces the levels of AMOTp130 expression in HEK293T cells.

177

178 **WWOX alters the intracellular localization pattern of AMOTp130.**



179 We have shown previously that AMOTp130 displays a tubular, filamentous pattern of  
180 distribution in the cytoplasm of HEK293T cells as determined by confocal microscopy (31).  
181 Here, we sought to determine whether co-expression of WWOX would alter this  
182 intracellular distribution of AMOTp130, in addition to its observed role in reducing the level  
183 of AMOTp130 expression. Briefly, HEK293T cells were transfected with AMOTp130,  
184 WWOX, or both AMOTp130 + WWOX, and cells were imaged using confocal microscopy  
185 (Fig. 4). We observed the expected tubular pattern of AMOTp130 (green) throughout the  
186 cytoplasm when expressed alone, and we observed an overall diffuse cytoplasmic pattern  
187 with some punctate staining for WWOX (red) when expressed alone (Fig. 4). Interestingly,  
188 cells co-expressing AMOTp130 and WWOX revealed a dramatic change in the  
189 distribution pattern for AMOTp130 from a tubular pattern to a more punctate and  
190 perinuclear localized pattern (Fig. 4). Indeed, AMOTp130 appeared to become  
191 sequestered in small puncta/vesicles with a minimal amount of colocalization (Fig. 4, inset  
192 box) in cells expressing WWOX. In sum, we observed a profound change in the pattern  
193 of distribution for AMOTp130 in the absence vs. presence of WWOX, which likely  
194 correlates with the observed reduction in expression levels of AMOTp130 described  
195 above.

196

#### 197 **Increased expression of WWOX reduces AMOT expression and VP40 VLP egress.**

198 Next, we wanted to determine whether increased expression of WWOX would  
199 simultaneously reduce expression of AMOTp130 and inhibit egress of VP40 VLPs.  
200 HEK293T cells were transfected with constant amounts of AMOTp130 and eVP40 or  
201 mVP40 plasmids along with increasing amounts of WWOX, and levels of the indicated

202 proteins were quantified in cell extracts and VLPs by Western blotting (Fig. 5).  
203 Interestingly, we observed that WWOX selectively and significantly reduced the levels of  
204 AMOTp130 in cell extracts in a dose-dependent manner without any effect on the levels  
205 of eVP40 (Figs. 5A and 5B) or mVP40 (Figs. 5C and 5D) in the same cell extracts. In  
206 contrast, the production of eVP40 (Figs. 5A and 5B) and mVP40 (Figs. 5C and 5D) VLPs  
207 was significantly decreased in a dose-dependent manner with increasing expression of  
208 WWOX (Figs. 5A and 5C, VLPs, compare lanes 2-6). These results imply that the  
209 observed WWOX-mediated reduction of AMOTp130 expression is specific, and that this  
210 reduction of AMOTp130 may negatively regulate egress of VP40 VLPs.

211

#### 212 **WWOX and AMOT affect the intracellular localization of VP40.**

213 Next, we used confocal microscopy to visualize any changes in the spatial distribution  
214 of VP40 in the absence or presence of WWOX and AMOTp130. Briefly, eVP40 and AMOT  
215 were expressed in HEK 293T cells in the absence (Fig. 6, top row) or presence (Fig. 6,  
216 middle and bottom row) of WWOX, and representative confocal images are shown. As  
217 expected, eVP40 was present throughout the cytoplasm with light accumulation at the  
218 plasma membrane, and AMOT was distributed as tubular bundles throughout the cells  
219 (Fig. 6, top row, arrow). Conversely, VP40 appeared to accumulate more heavily at the  
220 cell periphery and could be detected more readily in the nucleus in cells co-expressing  
221 both AMOT and WWOX (Fig. 6, middle and bottom rows, triangles). Notably, AMOT no  
222 longer displayed the tubular pattern in these cells, but rather was more punctate and  
223 disperse. These data show that exogenous expression of WWOX resulted in  
224 redistribution of both AMOT and VP40. It is tempting to speculate that WWOX disrupts

225 the normal cytoskeletal association of AMOT leading to its degradation in punctate  
226 vesicles. Moreover, WWOX may “drag” a portion of VP40 into the nucleus and the  
227 remainder of VP40 accumulates at the plasma membrane where it remains tethered and  
228 unable to bud efficiently due in part to the disruption of AMOT tubular distribution (see  
229 Supp. Video S1).

230

### 231 **Inhibition of VP40 VLP egress by WWOX is dependent on expression of AMOTp130.**

232 To further test our hypothesis that disruption of AMOTp130 expression by WWOX  
233 leads to a decrease in VP40 VLP egress, we used shCtrl and shAMOT knockdown cell  
234 lines in our VLP budding assay (Fig. 7). Briefly, shCtrl and shAMOT cells were transfected  
235 with a constant amount of eVP40 (Figs. 7A + 7B) or mVP40 (Figs. 7C + 7D) in the absence  
236 or presence of increasing amounts of WWOX, and cell lysates and VLPs were harvested  
237 for analysis by Western blotting. We observed a significant decrease in both eVP40 (10-  
238 fold) and mVP40 (50-fold) VLP egress in the shCtrl cells in the presence of WWOX (Figs.  
239 7A and 7C, compare lanes 1-3). As expected from prior results, budding of both eVP40  
240 and mVP40 VLPs is significantly reduced in shAMOT cells compared to that in shCtrl cells  
241 (Figs. 7A and 7C, compare lanes 1 and 4). Notably, expression of WWOX did not  
242 significantly decrease budding of either eVP40 (<2-fold) or mVP40 (2-fold) in the shAMOT  
243 cells (Figs. 7A and 7C, compare lanes 4-6). In sum, these results support our hypothesis  
244 that inhibition of VP40 VLP egress by WWOX is due, in part, to WWOX’s physical  
245 interaction with, and functional disruption of, AMOTp130.

246

### 247 **WWOX induces lysosomal degradation of AMOTp130.**

248 The ubiquitin-proteasome system and the lysosomal pathway are the two major  
249 pathways involved in protein degradation and turnover in eukaryotic cells. As a  
250 multifunctional scaffolding protein, AMOTp130 expression and stability are tightly  
251 regulated by other host proteins/pathways including LATS1/2 kinases and E3 ubiquitin  
252 ligases such as Nedd4 and Itch (25, 33-39). Thus, it was of interest to determine more  
253 precisely how WWOX expression may induce degradation of AMOTp130. Since  
254 AMOTp130 appeared to be sequestered in punctate vesicles in the presence of WWOX  
255 (Figs. 4 and 6), we hypothesize that AMOTp130 may be subjected to degradation by the  
256 lysosomal pathway. To test our hypothesis, we utilized confocal microscopy and  
257 incorporated lysosomal marker protein LAMP1, to determine whether AMOTp130  
258 localizes to lysosomes in the presence of WWOX (Fig. 8A). We observed the expected  
259 tubular pattern of AMOTp130 in the absence of WWOX, and under these conditions,  
260 AMOTp130 did not colocalize with LAMP1 (Fig. 8A, top row). In contrast, we observed  
261 clear colocalization of AMOTp130 in vesicles containing LAMP1 and the loss of the  
262 tubular pattern in the presence of WWOX (Fig. 8A, bottom row, arrows and zoomed view).

263 To further illustrate the temporal and spatial distribution dynamics of AMOTp130 and  
264 LAMP1 in the absence or presence of WWOX, we conducted time-lapse confocal  
265 microscopy using live HEK293T cells (Fig. 8B). Briefly, YFP-AMOTp130 and mCherry-  
266 LAMP1 fusion proteins were co-expressed in HEK 293T cells with vector alone or WWOX.  
267 At 12 hours post-transfection, cells were subjected to live cell spinning disk confocal  
268 microscopy for 5 hours, and images were taken every 10 minutes. Representative images  
269 at each hour time point are shown highlighting the changes in localization of AMOTp130  
270 in the absence or presence of WWOX (Fig. 8B). We observed that the tubular pattern of

271 AMOTp130 did not change significantly over time in cells lacking WWOX (Fig. 8B, top  
272 panels). In contrast, the tubular distribution pattern of AMOTp130 was altered to a more  
273 punctate pattern over time in the presence of WWOX (Fig. 8B, bottom panels). Taken  
274 together, these results suggest that the mechanism by which WWOX reduces expression  
275 of AMOTp130 involves lysosomal-mediated degradation.

276

277 **Pharmacological inhibition of lysosome function restores expression of**  
278 **AMOTp130 and rescues VP40 VLP budding in the presence of WWOX.**

279 If WWOX-mediated degradation of AMOTp130 occurs via the lysosomal pathway, then  
280 we reasoned that treating cells with lysosomal inhibitor chloroquine (CQ) (40, 41) should  
281 restore expression of AMOTp130 and rescue VP40 VLP egress in the presence of  
282 WWOX. To assess restoration of AMOTp130 expression, HEK293T cells were either  
283 mock-treated, or treated with CQ and transfected with the indicated combination of  
284 AMOTp130 and WWOX plasmids (Figs. 9A and 9B). As expected, AMOTp130 levels  
285 were significantly reduced in mock-treated cells in the presence of WWOX (Fig. 9A, lanes  
286 1-3; Fig. 9B); however, there was no significant change in AMOTp130 levels in cells  
287 treated with CQ in the presence of WWOX (Fig. 9A, lanes 4-6; Fig. 9B). When we co-  
288 expressed eVP40 under the same conditions, we observed almost a complete rescue of  
289 eVP40 VLP budding back to WT levels in cells treated with CQ in the presence of WWOX  
290 (Fig. 9C, lanes 5 and 6; Fig. 9D) compared to mock-treated controls (Fig. 9C, lanes 3 and  
291 4; Fig. 9D). These findings suggest that the rescue of eVP40 VLP egress in CQ-treated  
292 cells is likely due, in part, to the restoration of AMOTp130 back to WT levels.

293 Lastly, we asked whether the ubiquitin-proteasome system may also be involved in  
294 WWOX-mediated degradation of AMOTp130 using a pharmacological approach. Briefly,  
295 HEK293T cells were treated with DMSO or the proteasome inhibitor, MG132 (39), and  
296 cells were transfected with the indicated combinations of plasmids (Fig. 9E). In contrast  
297 to our findings following treatment with CQ, treatment of cells with MG132 did not lead to  
298 restoration of AMOTp130 levels in the presence of WWOX (Fig. 9E, 9F). In sum, these  
299 results suggest that WWOX represses AMOT by induction of its lysosomal degradation,  
300 and thus modulates AMOT and eventually leads to the inhibition of VLPs egress.

301

## 302 **DISCUSSION**

303 EBOV and MARV VP40 matrix protein utilizes L-domain motifs (PPxY, PTAP, YxxL) to  
304 recruit specific host proteins to facilitate virus egress and dissemination (5, 8, 9, 42, 43).  
305 In addition to the recruitment of host proteins that positively regulate budding (e.g. Tsg101,  
306 Nedd4, Itch, WWP1, and Smurf2) (11, 16, 17, 42, 44), the VP40 PPxY L-domain also  
307 engages with host proteins that negatively regulate VP40-mediated egress (e.g. BAG3,  
308 YAP/TAZ, and WWOX) (12, 13, 15). Thus, the modular and competitive nature of the  
309 PPxY-WW domain interplay likely impacts both host and virus functions (18). Notably,  
310 host PPxY/WW-domain interactions regulate diverse signaling networks and major  
311 cellular processes, such as the Hippo pathway and cell division/migration.

312 Here, we describe how the physical and functional interaction between host  
313 AMOTp130 and host WWOX affects VP40 VLP budding (Fig. 10). AMOTp130 is a key  
314 multi-PPxY containing host protein that engages host WW-domain containing proteins  
315 that both positively and negatively impact viral budding. For example, AMOTp130

316 interacts with the YAP, BAG3, and WWOX in a PPxY/WW-domain dependent manner to  
317 function as a “master regulator” of several physiologically relevant pathways/processes,  
318 including transcription (Hippo pathway), apoptosis, cytoskeletal dynamics, and tight  
319 junction (TJ) integrity (19, 23, 25, 26, 28, 45-48). In addition, AMOT stability and turnover  
320 is tightly regulated via PPxY/WW-domain interactions with Nedd4 E3 ubiquitin ligase  
321 family members (34-36, 39). While Amot was previously shown to regulate assembly and  
322 egress of non-PPxY-containing viruses (49, 50), we recently revealed a role for  
323 endogenous AMOT in positively regulating egress of PPxY-containing EBOV and MARV  
324 (12, 13, 31).

325 We showed that WWOX reduced expression and modulated intracellular distribution  
326 of AMOTp130 in a PPxY/WW-domain dependent manner. Indeed, we observed a dose-  
327 dependent reduction in expression of PPxY-containing AMOTp130, but not PPxY-lacking  
328 AMOTp80, in the presence of WWOX (Fig. 1). Moreover, expression of a mutant  
329 AMOTp130 containing mutations in all three PPxY motifs was not affected by exogenous  
330 expression of WWOX (Fig. 2), and a WW-domain mutant of WWOX did not reduce the  
331 levels of AMOTp130 compared to that of WT WWOX (Fig. 3).

332 Under conditions of exogenous expression of WWOX, we observed that budding of  
333 both eVP40 and mVP40 VLPs was significantly reduced (Fig. 4). We hypothesized that  
334 one possible mechanism could be that WWOX was negatively regulating budding of VP40  
335 VLPs indirectly, by reducing expression of AMOTp130 and preventing it from facilitating  
336 egress of VLPs from the plasma membrane as reported previously (13, 31). In support of  
337 this hypothesis, we found that budding of both eVP40 and mVP40 VLPs was not  
338 significantly reduced in shAMOT cells in the presence of WWOX, but was significantly

339 reduced in shCtrl cells in the presence of WWOX (Fig. 7). These findings suggest that  
340 WWOX's negative effect on VP40 VLP egress is the result of a novel, indirect mechanism  
341 of action that requires expression of, and likely an interaction with, endogenous  
342 AMOTp130.

343 We sought to further understand the mechanism by which WWOX reduced expression  
344 of AMOTp130. Toward this end, our results suggest that WWOX mediates reduction of  
345 AMOTp130 levels via the lysosomal degradation pathway as judged by confocal  
346 microscopy and the use of pharmacological inhibitors (Figs. 8 and 9). Notably, WWOX  
347 was unable to reduce expression of AMOTp130 in cells treated with chloroquine  
348 compared to controls. These conditions also resulted in the restoration of budding of  
349 VP40 VLPs to near WT levels in cells expressing WWOX and treated with chloroquine.  
350 In contrast to the results with chloroquine, WWOX retained the ability to reduce the levels  
351 of AMOTp130 in cells treated with MG132, suggesting that WWOX-mediated degradation  
352 of AMOTp130 was not occurring via the ubiquitin/proteasome pathway.

353 In addition to the indirect mechanism of inhibition of VLP budding described above, our  
354 data also suggest that WWOX can inhibit egress of VP40 VLPs via a direct PPxY/WW-  
355 domain interaction that leads to reduced levels of VP40 at the plasma membrane and  
356 increased levels of VP40 detected in the nucleus (Fig. 10) (12). Indeed, we observed  
357 enhanced nuclear localization of VP40 in cells expressing WWOX. Since WWOX contains  
358 a nuclear localization signal and normally shuttles in and out of the nucleus (51), one  
359 possibility is that WWOX may sequester or drag some VP40 into the nucleus as a result  
360 of a direct PPxY/WW-domain interaction, leading to a subsequent decrease in VLP  
361 budding. Interestingly, nuclear localization of eVP40 has been reported previously (52-



362 54); however, a functional role for nuclear eVP40 has not been described. Investigations  
363 into a potential role for eVP40 in the nucleus may be warranted due in part to the  
364 identification of nuclear transcriptional regulators such as WWOX and YAP/TAZ as  
365 specific host interactors. It is tempting to speculate that host proteins such as WWOX  
366 and YAP/TAZ may interact with and translocate eVP40 into the nucleus where these  
367 virus-host complexes may then affect transcription of WWOX and/or YAP/TAZ responsive  
368 genes to generate a cellular environment beneficial for virus replication, budding, and/or  
369 disease progression. Alternatively, since WWOX is known to directly bind to multiple  
370 transcriptional activators, such as p38, p73, AP-2 $\gamma$ , ErBb4, c-Jun and RUNX2, in a  
371 PPxY/WW domain dependent manner (22, 23, 55-59), it will be of interest to determine  
372 whether there is any competitive interplay among these host proteins and PPxY-  
373 containing VP40 proteins in VP40 expressing or virus infected cells that may result in a  
374 biological consequences having an impact on both the virus and host. Such studies may  
375 also provide novel insights into the development of new host-oriented antivirals that target  
376 these modular virus-host interactions.

377

## 378 **MATERIALS AND METHODS**

### 379 **Cells, antibodies, and plasmids.**

380 HEK293T-based shCtrl and shAMOT cells (kindly provided by J. Kissil, Scripps Research,  
381 FL) and HEK293T cells were maintained in Dulbecco's modified Eagle's medium (DMEM)  
382 (CORNING) supplemented with 10% fetal bovine serum (FBS) (GIBCO), penicillin  
383 (100U/ml)/streptomycin (100 $\mu$ g/ml) (INVITROGEN). Cells were grown at 37°C in a  
384 humidified 5% CO<sub>2</sub> incubator. The primary antibodies used in this study include mouse

385 anti-myc (Millipore), mouse anti-HA antibody (Sigma), mouse anti-flag (Sigma), mouse  
386 anti-AMOT (Santa Cruz), rabbit anti-eVP40 (IBT), mouse anti  $\beta$ -actin (Proteintech). The  
387 plasmids encoding eVP40, GFP-eVP40 were described previously (8, 42). Flag-tagged  
388 mVP40 was kindly provided by S. Becker (Institut für Virologie, Marburg, Germany). The  
389 flag tagged AMOT PY123, PY1, PY2 and PY3 mutants were kindly provided by J. Kissil  
390 (Scripps Research Institute, FL). The YFP-tagged AMOTp130 was kindly provided by K-  
391 L. Guan (University of California, San Diego). The mCherry-tagged LAMP1 was a gift  
392 from Amy Palmer (Addgene plasmid # 45147). The myc-tagged WWOX plasmid was  
393 kindly provided by R. I. Aqeilan (Jerusalem, Israel). The mutants of WWOX were  
394 generated via QuikChange™ method, and primers used are as follows:

395 Y33R1: 5'GGTGTGATTGGCGTAGCGAACCCAGCCGTCCTTG3',

396 Y33R2: 5'CAAGGACGGCTGGGTTTCGCTACGCCAATCACACC3'.

397 W44AP47A1:5'TTTCTTTTTCCAGTTTTTGCATGTTCCGCCTGAGTCTTCTCCTCGGTG3',

398 W44AP47A2:5'CACCGAGGAGAAGACTCAGGCGGAACATGCAAAAAGTGGAAAAAGAAA3'.

399  $\Delta$ WW1: 5'CATCCACAGTAAACGCGTCCTCACTGTCCGTG3',

400  $\Delta$ WW2: 5'CACGGACAGTGAGGACGCGTTTACTGTGGATG3'.

#### 401 **Immunoprecipitation assay**

402 HEK293T cells seeded in 6 well plates were transfected with the indicated plasmid  
403 combinations using Lipofectamine reagent (INVITROGEN). At 24 hours post transfection,  
404 cells were harvested and lysed, and the cell extracts were subjected to Western blotting  
405 (WB) and co-immunoprecipitation (IP). The protein complexes were precipitated by either  
406 mouse IgG or anti-myc antibody. First, the cell extracts were incubated with antisera  
407 overnight at 4°C with continuous rotation, then the protein A/G agarose beads (Santa  
408 Cruz) were added to the mixtures and incubated for 5 hours with continuous rotation.

409 After incubation, beads were collected via centrifugation and washed 5 times. The input  
410 cell extracts and immunoprecipitates were then detected by WB with appropriate antisera  
411 as indicated.

#### 412 **Western blotting and VLP budding assays**

413 HEK293T cells were transfected with 0.25 $\mu$ g AMOT p130 or p80 plus with increasing  
414 amounts (0.1, 0.25, 0.5, 1.0 $\mu$ g) of WWOX plasmids, or cells were transfected with 0.25 $\mu$ g  
415 AMOTp130 WT or PY123, PY1, PY2, PY3 mutants plus with increasing amounts (0.25,  
416 0.5 $\mu$ g) of WWOX plasmids. The total amount of transfected DNA was equivalent in all  
417 samples. Cell extracts were harvested at 24 hours post transfection then subjected to  
418 SDS-PAGE and WB analyses.

419 HEK293T cells were transfected with 0.25 $\mu$ g AMOT and 0.5 $\mu$ g WT or mutant WWOX.  
420 Cell extracts were subjected to WB and IP analyses. For VLP budding and WWOX  
421 titration experiments, HEK293T cells were transfected with 0.2 $\mu$ g of eVP40 or flag-tagged  
422 mVP40, plus 0.25 $\mu$ g AMOTp130 and increasing amounts (0.1, 0.25, 0.5, 1.0 $\mu$ g) of  
423 WWOX plasmids. The eVP40 and mVP40 in VLPs and the indicated proteins in cell  
424 extracts were detected by WB.

#### 425 **Indirect immunofluorescence assay**

426 HEK293T cells were transfected with the indicated plasmid combinations. At 24 hours  
427 post transfection, cells were washed with cold PBS and fixed with 4% formaldehyde for  
428 20 min at room temperature, then permeabilized with 0.2% Triton X-100. After washing  
429 3X with PBS, cells were blocked for 1 hour, then incubated with rabbit anti-myc (WWOX)  
430 or mouse anti-HA (AMOT) antisera. Next, cells were stained with Alexa Fluor 488, 594 or  
431 647 goat anti-mouse/rabbit secondary antibodies (LIFE TECHNOLOGIES). The GFP-

432 eVP40 and mCherry-LAMP1 were visualized via fluorescent tag. Cells were mounted with  
433 ProLong™ Glass Antifade Mountant with Hoechst 33342 (LIFE TECHNOLOGIES).  
434 Microscopy was performed using a Leica SP5 FLIM inverted confocal microscope. Serial  
435 optical planes of focus were taken, and the collected images were merged into one by  
436 using the Leica microsystems (LAS AF) software.

#### 437 **VLP budding assay in HEK293T shCtrl and shAMOT cells**

438 HEK293T shCtrl and shAMOT cells were transfected with 0.2µg of eVP40 or mVP40 plus  
439 vector or 0.25, 0.5µg of WWOX. VP40 VLPs and eVP40, mVP40, WWOX and  
440 endogenous AMOTp130 in cell extracts were detected by WB using appropriate antisera.

#### 441 **Live cell imaging and time-lapse microscopy**

442 HEK293T cells were seed on chambered coverglasses and transfected with YFP-AMOT  
443 (0.25µg) and mCherry-LAMP1 (0.25µg) plus vector or WWOX (0.5µg). Live cells were  
444 observed at 12 hours post transfection using a Leica DMI4000 microscope with  
445 Yokagawa CSU-X1 spinning disk confocal attachment. Images were taken every 10  
446 minutes over a 5-hour window of observation.

#### 447 **Pharmacological inhibition of lysosome or proteosome functions**

448 HEK293T cells were transfected with 0.25µg AMOTp130 plus vector or 0.25, 0.5µg  
449 WWOX plasmids. For lysosomal inhibition, cells were untreated or treated with CQ  
450 (50µM) for 16 hours. For proteasomal inhibition, cells were treated with DMSO or MG132  
451 (10µM) at 8 hours before harvest. The indicated proteins were detected via WB. For VLP  
452 budding, HEK293T cells were transfected with 0.2µg eVP40 alone or with 0.25µg  
453 AMOTp130 and 0.25, 0.5µg WWOX plasmids. At 6 hours post transfection, cells were

454 untreated or treated with CQ (50 $\mu$ M) for 16 hours. Then cell extracts and VLPs were  
455 harvested and subjected to WB analysis.

456

## 457 **ACKNOWLEDGEMENTS**

458 The authors would like to thank J. Kissil, R. Aqeilan, K-L Guan, and M. Sudol for kindly  
459 providing reagents. Funding was provided in part by National Institutes of Health grants  
460 AI138052, AI139392, AI153815, and EY031465 to RNH.

461

## 462 **FIGURE LEGENDS**

463 **FIG. 1 WWOX interacts with AMOT and reduces its expression levels in a dose-**  
464 **dependent manner. A)** Extracts from HEK 293T cells transfected with myc-tagged WWOX  
465 and HA-tagged AMOT were immunoprecipitated (IP) with either normal mouse IgG or  
466 anti-myc antibody. AMOT and WWOX were detected in the precipitates by Western blot  
467 (WB). Expression controls for AMOT, WWOX and  $\beta$ -actin are shown at the left panel. **B)**  
468 Extracts from HEK 293T cells transfected with WWOX alone were IP with either normal  
469 mouse IgG or anti-myc antibody. Endogenous AMOT and WWOX were detected in the  
470 precipitates by WB. **C)** HEK293T cells were transfected with AMOTp130 or p80 plus  
471 vector (-) or increasing amounts of WWOX. The indicated proteins were detected by WB  
472 and AMOT expression levels were quantified ( ) using NIH Image-J. The amounts of  
473 AMOT in control cells (lane 1) were set at 100%. The relative levels of AMOT are shown  
474 in ( ). **D)** Quantification of the AMOT levels from three independent experiments. Statistical  
475 significance was analyzed by a one-way ANOVA. ns: not significant, \*\*= p<0.01, \*\*\*\*=  
476 p<0.0001.

477

478 **FIG. 2** WWOX interacts with and suppresses AMOT expression in a PY motif dependent  
479 manner. **A-C)** Extracts from HEK293T cells transfected with myc-tagged WWOX and HA-  
480 tagged AMOT WT(A), flag-tagged AMOT PY1, PY2, PY3 (B) or PY123 (C) were  
481 immunoprecipitated with either normal mouse IgG or anti-myc antibody. WWOX, AMOT  
482 WT and PY motif mutants were detected in the precipitates by WB. Expression controls  
483 for AMOT WT and PY mutants, WWOX and  $\beta$ -actin are shown in the left panels. **D-E)**  
484 HEK293T cells were transfected with AMOT WT or PY123 (D), PY1, PY2, PY3 (E)  
485 mutants plus with vector (-) or increasing amount of WWOX, the indicated proteins were  
486 detected by WB and AMOT levels were quantified ( ) using NIH Image-J. **F)** Quantification  
487 of the AMOT levels in (D) and (E) from three independent experiments. Statistical  
488 significance was analyzed by a one-way ANOVA. ns: not significant, \*= $p < 0.05$ , \*\*=  
489  $p < 0.01$ , \*\*\*\*=  $p < 0.0001$ . **G)** Schematic diagram of AMOTp130 with key domains  
490 highlighted. CC = coiled coil domain; PDZ = PSD-95/Dlg1/ZO-1 domain.

491

492 **FIG. 3** WW-domain #1 of WWOX interacts with AMOT. Extracts from HEK293T cells  
493 transfected with myc-tagged WT or the indicated mutants of WWOX and HA-tagged  
494 AMOT were subjected to IP. WWOX and AMOT in the precipitates (**A**) and cell extracts  
495 (**B**) were subjected to Western blotting analysis. **C)** Quantification of the AMOT protein  
496 levels in (B) from three independent experiments. Statistical significance was analyzed  
497 by a one-way ANOVA. \*\*=  $p < 0.01$ , \*\*\*\*=  $p < 0.0001$ . **D)** Schematic diagram of WWOX with  
498 key domains highlighted. The Y33, W44, and P47 are three crucial amino acids in WW1  
499 domain that mediate binding to PY motif; NLS=nuclear localization signal, SDR=Short-

500 chain Dehydrogenase/ Reductase domain.

501

502 **FIG. 4** WWOX alters the intracellular distribution of AMOT. HEK293T cells were  
503 transfected with AMOT (green) and WWOX (red) alone or co-transfected with both. Cells  
504 were then visualized via immunofluorescence staining. Scale bars = 10 $\mu$ m.

505

506 **FIG. 5** WWOX suppresses AMOT expression and inhibits VP40 VLP egress. A and C)

507 HEK293T cells were transfected with a constant amount of eVP40 (A), mVP40 (C) and  
508 AMOT plus vector (-) or increasing amounts of WWOX. The indicated proteins were  
509 detected in cell extracts and VLPs by WB. The cellular levels of AMOT, eVP40, mVP40  
510 and VP40 in VLPs were quantified using NIH Image-J. The amounts of eVP40 (A, cells,  
511 lane 1), mVP40 (C, cells, lane 1), AMOT (A, C cells, lane 2) in control cells were set at  
512 100%. Also, eVP40 (A, VLPs, lane 1) and mVP40 (C, VLPs, lane 1) VLP production from  
513 control cells was set at 100%. Numbers in ( ) represent relative protein levels and VLP  
514 budding efficiency compared to the control. **B and D)** Quantification of the indicated  
515 cellular protein levels and relative budding efficiency of eVP40 (B) and mVP40 (D) VLPs  
516 from three independent experiments. Statistical significance was analyzed by a one-way  
517 ANOVA. ns: not significant, \*\*= $p < 0.01$ , \*\*\*= $p < 0.001$ , \*\*\*\*= $p < 0.0001$ .

518

519 **FIG. 6** Expression of WWOX and AMOT affects localization of VP40. HEK293T cells were  
520 transfected with eVP40 (green) and AMOT (red) alone, or with WWOX (white) and  
521 visualized by confocal microscopy. Scale bars = 10 $\mu$ m.

522

523 **FIG. 7** Expression of AMOT is required for WWOX-mediated inhibition of VP40 VLP  
524 egress. A and C) shCtrl and shAMOT cells were transfected with a constant amount of  
525 eVP40 (A) or mVP40 (B) with vector alone (-) or increasing amounts of WWOX. The  
526 indicated proteins were detected in cell extracts and VLPs by WB. VP40 levels in VLPs  
527 were quantified (C) using NIH Image-J software. **B and D**) Quantification of the relative  
528 budding efficiency of eVP40 (B) or mVP40 (D) VLPs from three independent experiments  
529 (n=3). WWOX minus samples were normalized independently for Control and shAMOT  
530 conditions (B and D). Statistical significance was analyzed by a one-way ANOVA. ns: not  
531 significant, \*= $p<0.05$ , \*\*= $p<0.001$ , \*\*\*= $p<0.001$ , \*\*\*\*= $p<0.0001$ .

532  
533 **FIG. 8** WWOX induces lysosomal degradation of AMOT. **A**) HEK293T cells were  
534 transfected with the indicated combinations of plasmids including lysosome marker  
535 mCherry-LAMP1 (red), AMOT (green), and WWOX (white). Cells were visualized using  
536 confocal microscopy. Scale bars = 10 $\mu$ m. The zoomed view and arrows highlight co-  
537 localization of AMOT and LAMP1 in lysosomes. **B**) HEK293T cells were transfected with  
538 YFP-AMOT and mCherry-LAMP1 plus vector (Control) or WWOX. Live cells were  
539 observed via spinning disk confocal microscopy beginning at 12 hours post transfection.  
540 Representative images showing the localization of AMOT in control and WWOX  
541 expressing cells at each hour during observation. Scale bars = 10 $\mu$ m.

542  
543 **FIG. 9** Pharmacological inhibition of lysosome function restores AMOT expression and  
544 rescues VP40 VLP budding. A) HEK293T cells were transfected with a constant amount  
545 of AMOT plus vector (-) or increasing amounts of WWOX. After transfection, cells were



546 treated with (lanes 4-6) or without (lanes 1-3) lysosomal inhibitor chloroquine (50 $\mu$ M) for  
547 16 hours. The indicated proteins were detected in cell extracts by WB. AMOT levels were  
548 quantified ( ) using NIH Image-J. **B)** Quantification of AMOT (A) from three independent  
549 experiments (n=3). Statistical significance was analyzed by a one-way ANOVA. ns: not  
550 significant, \*\*\*=p<0.001, \*\*\*\*= p<0.0001. **C)** HEK293T cells were transfected with a  
551 constant amount of eVP40, and AMOT plus vector (-) or increasing amounts of WWOX.  
552 Cells were treated with (lanes 5, 6) or without (lanes 3, 4) CQ (50 $\mu$ M) for 16 hours. The  
553 indicated proteins were detected in cell extracts and VLPs by WB. The yields of eVP40  
554 VLPs were quantified ( ) using NIH Image-J software. **D)** Quantification of the relative  
555 budding efficiency of eVP40 VLPs under the indicated conditions from three independent  
556 experiments (n=3). Statistical significance was analyzed by a one-way ANOVA. ns: not  
557 significant, \*=p<0.05, \*\*\*\*= p<0.0001. **E)** HEK293T cells were transfected with the a  
558 constant amount of AMOT plus vector (-) or increasing amounts of WWOX. Cells were  
559 treated with (lanes 4-6) or without (lanes 1-3) proteasomal inhibitor MG132 (10 $\mu$ M) for 8  
560 hours before harvesting. The indicated proteins were detected in cell extracts by WB. **F)**  
561 Quantification of AMOT (E) from three independent experiments (n=3). Statistical  
562 significance was analyzed by a one-way ANOVA. ns: not significant, \*\*\*=p<0.001, \*\*\*\*=  
563 p<0.0001.

564

565 **FIG. 10** Working model of PPxY/WW-domain interactions among AMOT, WWOX and  
566 VP40. **Left:** AMOT facilitates VP40 VLP egress via its ability to bind actin and regulate  
567 its dynamics at the plasma membrane. **Right:** Exogenously expressed WWOX interacts  
568 with both AMOT and VP40 in a PPxY/WW-domain dependent manner. These interactions

569 lead to reduced levels of VP40 at the plasma membrane, enhanced nuclear localization  
570 of VP40 (red arrow), and lysosomal mediated degradation of AMOT (black arrow); all of  
571 which results in a decrease of VLP egress.

572

## 573 **REFERENCES**

- 574 1. Malvy D, McElroy AK, de Clerck H, Günther S, van Griensven J. 2019. Ebola virus  
575 disease. *The Lancet* 393:936-948.
- 576 2. Sweileh WM. 2017. Global research trends of World Health Organization's top  
577 eight emerging pathogens. *Global Health* 13:9.
- 578 3. Nyakarahuka L, Shoemaker TR, Balinandi S, Chemos G, Kwesiga B, Mulei S,  
579 Kyondo J, Tumusiime A, Kofman A, Masiira B, Whitmer S, Brown S, Cannon D,  
580 Chiang CF, Graziano J, Morales-Betoulle M, Patel K, Zufan S, Komakech I, Natseri  
581 N, Chepkwurai PM, Lubwama B, Okiria J, Kayiwa J, Nkonwa IH, Eyu P, Nakiire L,  
582 Okarikod EC, Cheptoyek L, Wangila BE, Wanje M, Tusiime P, Bulage L, Mwebesa  
583 HG, Ario AR, Makumbi I, Nakinsige A, Muruta A, Nanyunja M, Homsy J, Zhu BP,  
584 Nelson L, Kaleebu P, Rollin PE, Nichol ST, Klena JD, Lutwama JJ. 2019. Marburg  
585 virus disease outbreak in Kween District Uganda, 2017: Epidemiological and  
586 laboratory findings. *PLoS Negl Trop Dis* 13:e0007257.
- 587 4. Makino A, Yamayoshi S, Shinya K, Noda T, Kawaoka Y. 2011. Identification of  
588 amino acids in Marburg virus VP40 that are important for virus-like particle  
589 budding. *J Infect Dis* 204 Suppl 3:S871-7.

- 590 5. Liu Y, Cocka L, Okumura A, Zhang YA, Sunyer JO, Harty RN. 2010. Conserved  
591 motifs within Ebola and Marburg virus VP40 proteins are important for stability,  
592 localization, and subsequent budding of virus-like particles. *J Virol* 84:2294-303.
- 593 6. Kolesnikova L, Ryabchikova E, Shestopalov A, Becker S. 2007. Basolateral  
594 budding of Marburg virus: VP40 retargets viral glycoprotein GP to the basolateral  
595 surface. *J Infect Dis* 196 Suppl 2:S232-6.
- 596 7. Kolesnikova L, Bugany H, Klenk HD, Becker S. 2002. VP40, the matrix protein of  
597 Marburg virus, is associated with membranes of the late endosomal compartment.  
598 *J Virol* 76:1825-38.
- 599 8. Harty RN, Brown ME, Wang G, Huibregtse J, Hayes FP. 2000. A PPxY motif within  
600 the VP40 protein of Ebola virus interacts physically and functionally with a ubiquitin  
601 ligase: implications for filovirus budding. *Proc Natl Acad Sci U S A* 97:13871-6.
- 602 9. Harty RN. 2009. No exit: targeting the budding process to inhibit filovirus  
603 replication. *Antiviral Res* 81:189-97.
- 604 10. Harty RN. 2018. Hemorrhagic Fever Virus Budding Studies. *Methods Mol Biol*  
605 1604:209-215.
- 606 11. Shepley-McTaggart A, Schwoerer MP, Sagum CA, Bedford MT, Jaladanki CK, Fan  
607 H, Cassel J, Harty RN. 2021. Ubiquitin Ligase SMURF2 Interacts with Filovirus  
608 VP40 and Promotes Egress of VP40 VLPs. *Viruses* 13.
- 609 12. Liang J, Ruthel G, Sagum CA, Bedford MT, Sidhu SS, Sudol M, Jaladanki CK, Fan  
610 H, Freedman BD, Harty RN. 2021. Angiotensin Counteracts the Negative  
611 Regulatory Effect of Host WWOX on Viral PPxY-Mediated Egress. *J Virol* 95.

- 612 13. Han Z, Dash S, Sagum CA, Ruthel G, Jaladanki CK, Berry CT, Schwoerer MP,  
613 Harty NM, Freedman BD, Bedford MT, Fan H, Sidhu SS, Sudol M, Shtanko O,  
614 Harty RN. 2020. Modular mimicry and engagement of the Hippo pathway by  
615 Marburg virus VP40: Implications for filovirus biology and budding. *PLoS Pathog*  
616 16:e1008231.
- 617 14. Han Z, Schwoerer MP, Hicks P, Liang J, Ruthel G, Berry CT, Freedman BD,  
618 Sagum CA, Bedford MT, Sidhu SS, Sudol M, Harty RN. 2018. Host Protein BAG3  
619 is a Negative Regulator of Lassa VLP Egress. *Diseases* 6.
- 620 15. Liang J, Sagum CA, Bedford MT, Sidhu SS, Sudol M, Han Z, Harty RN. 2017.  
621 Chaperone-Mediated Autophagy Protein BAG3 Negatively Regulates Ebola and  
622 Marburg VP40-Mediated Egress. *PLoS Pathog* 13:e1006132.
- 623 16. Han Z, Sagum CA, Takizawa F, Ruthel G, Berry CT, Kong J, Sunyer JO, Freedman  
624 BD, Bedford MT, Sidhu SS, Sudol M, Harty RN. 2017. Ubiquitin Ligase WWP1  
625 Interacts with Ebola Virus VP40 To Regulate Egress. *J Virol* 91.
- 626 17. Han Z, Sagum CA, Bedford MT, Sidhu SS, Sudol M, Harty RN. 2016. ITCH E3  
627 Ubiquitin Ligase Interacts with Ebola Virus VP40 To Regulate Budding. *J Virol*  
628 90:9163-71.
- 629 18. Shepley-McTaggart A, Fan H, Sudol M, Harty RN. 2020. Viruses go modular. *J*  
630 *Biol Chem* 295:4604-4616.
- 631 19. Klimek C, Kathage B, Wördehoff J, Höhfeld J. 2017. BAG3-mediated proteostasis  
632 at a glance. *J Cell Sci* 130:2781-2788.
- 633 20. Anonymous. 2019. WW Domain Proteins in Signaling, Cancer Growth, Neural  
634 Diseases, and Metabolic Disorders doi:10.3389/978-2-88963-177-3.

- 635 21. Chen YA, Lu CY, Cheng TY, Pan SH, Chen HF, Chang NS. 2019. WW Domain-  
636 Containing Proteins YAP and TAZ in the Hippo Pathway as Key Regulators in  
637 Stemness Maintenance, Tissue Homeostasis, and Tumorigenesis. *Front Oncol*  
638 9:60.
- 639 22. Lo JY, Chou YT, Lai FJ, Hsu LJ. 2015. Regulation of cell signaling and apoptosis  
640 by tumor suppressor WWOX. *Exp Biol Med (Maywood)* 240:383-91.
- 641 23. Abu-Odeh M, Bar-Mag T, Huang H, Kim T, Salah Z, Abdeen SK, Sudol M,  
642 Reichmann D, Sidhu S, Kim PM, Aqeilan RI. 2014. Characterizing WW domain  
643 interactions of tumor suppressor WWOX reveals its association with multiprotein  
644 networks. *J Biol Chem* 289:8865-80.
- 645 24. Rausch V, Hansen CG. 2020. The Hippo Pathway, YAP/TAZ, and the Plasma  
646 Membrane. *Trends Cell Biol* 30:32-48.
- 647 25. Dai X, She P, Chi F, Feng Y, Liu H, Jin D, Zhao Y, Guo X, Jiang D, Guan KL,  
648 Zhong TP, Zhao B. 2013. Phosphorylation of angiominin by Lats1/2 kinases  
649 inhibits F-actin binding, cell migration, and angiogenesis. *J Biol Chem* 288:34041-  
650 34051.
- 651 26. Zhao B, Li L, Lu Q, Wang LH, Liu CY, Lei Q, Guan KL. 2011. Angiominin is a novel  
652 Hippo pathway component that inhibits YAP oncoprotein. *Genes Dev* 25:51-63.
- 653 27. Moleirinho S, Guarrant W, Kissil JL. 2014. The Angiominins – From discovery to  
654 function. *588:2693-2703*.
- 655 28. Bratt A, Birot O, Sinha I, Veitonmaki N, Aase K, Ernkvist M, Holmgren L. 2005.  
656 Angiominin regulates endothelial cell-cell junctions and cell motility. *J Biol Chem*  
657 280:34859-69.

- 658 29. Moleirinho S, Hoxha S, Mandati V, Curtale G, Troutman S, Ehmer U, Kissil JL.  
659 2017. Regulation of localization and function of the transcriptional co-activator YAP  
660 by angiotenin. *Elife* 6.
- 661 30. Ulbricht A, Eppler FJ, Tapia VE, van der Ven PF, Hampe N, Hersch N, Vakeel P,  
662 Stadel D, Haas A, Saftig P, Behrends C, Fürst DO, Volkmer R, Hoffmann B,  
663 Kolanus W, Höhfeld J. 2013. Cellular mechanotransduction relies on tension-  
664 induced and chaperone-assisted autophagy. *Curr Biol* 23:430-5.
- 665 31. Han Z, Ruthel G, Dash S, Berry CT, Freedman BD, Harty RN, Shtanko O. 2020.  
666 Angiotenin regulates budding and spread of Ebola virus. *J Biol Chem* 295:8596-  
667 8601.
- 668 32. Schuchardt BJ, Mikles DC, Bhat V, McDonald CB, Sudol M, Farooq A. 2015.  
669 Allostery mediates ligand binding to WWOX tumor suppressor via a conformational  
670 switch. *J Mol Recognit* 28:220-31.
- 671 33. Adler JJ, Johnson DE, Heller BL, Bringman LR, Ranahan WP, Conwell MD, Sun  
672 Y, Hudmon A, Wells CD. 2013. Serum deprivation inhibits the transcriptional co-  
673 activator YAP and cell growth via phosphorylation of the 130-kDa isoform of  
674 Angiotenin by the LATS1/2 protein kinases. *Proc Natl Acad Sci U S A* 110:17368-  
675 73.
- 676 34. Adler JJ, Heller BL, Bringman LR, Ranahan WP, Cocklin RR, Goebel MG, Oh M,  
677 Lim HS, Ingham RJ, Wells CD. 2013. Amot130 adapts atrophin-1 interacting  
678 protein 4 to inhibit yes-associated protein signaling and cell growth. *J Biol Chem*  
679 288:15181-93.

- 680 35. Wang W, Li N, Li X, Tran MK, Han X, Chen J. 2015. Tankyrase Inhibitors Target  
681 YAP by Stabilizing Angiomotin Family Proteins. *Cell Rep* 13:524-532.
- 682 36. Choi KS, Choi HJ, Lee JK, Im S, Zhang H, Jeong Y, Park JA, Lee IK, Kim YM,  
683 Kwon YG. 2016. The endothelial E3 ligase HECW2 promotes endothelial cell  
684 junctions by increasing AMOTL1 protein stability via K63-linked ubiquitination. *Cell*  
685 *Signal* 28:1642-51.
- 686 37. Kim M, Kim M, Park SJ, Lee C, Lim DS. 2016. Role of Angiomotin-like 2 mono-  
687 ubiquitination on YAP inhibition. *EMBO Rep* 17:64-78.
- 688 38. Mana-Capelli S, McCollum D. 2018. Angiomotins stimulate LATS kinase  
689 autophosphorylation and act as scaffolds that promote Hippo signaling. *J Biol*  
690 *Chem* 293:18230-18241.
- 691 39. Wang C, An J, Zhang P, Xu C, Gao K, Wu D, Wang D, Yu H, Liu JO, Yu L. 2012.  
692 The Nedd4-like ubiquitin E3 ligases target angiomotin/p130 to ubiquitin-dependent  
693 degradation. *Biochem J* 444:279-89.
- 694 40. Seglen PO, Grinde B, Solheim AE. 1979. Inhibition of the lysosomal pathway of  
695 protein degradation in isolated rat hepatocytes by ammonia, methylamine,  
696 chloroquine and leupeptin. *Eur J Biochem* 95:215-25.
- 697 41. Dunmore BJ, Drake KM, Upton PD, Toshner MR, Aldred MA, Morrell NW. 2013.  
698 The lysosomal inhibitor, chloroquine, increases cell surface BMPR-II levels and  
699 restores BMP9 signalling in endothelial cells harbouring BMPR-II mutations.  
700 *Human Molecular Genetics* 22:3667-3679.
- 701 42. Licata JM, Simpson-Holley M, Wright NT, Han Z, Paragas J, Harty RN. 2003.  
702 Overlapping motifs (PTAP and PPEY) within the Ebola virus VP40 protein function

- 703 independently as late budding domains: involvement of host proteins TSG101 and  
704 VPS-4. *J Virol* 77:1812-9.
- 705 43. Han Z, Madara JJ, Liu Y, Liu W, Ruthel G, Freedman BD, Harty RN. 2015. ALIX  
706 Rescues Budding of a Double PTAP/PPEY L-Domain Deletion Mutant of Ebola  
707 VP40: A Role for ALIX in Ebola Virus Egress. *J Infect Dis* 212 Suppl 2:S138-45.
- 708 44. Urata S, Noda T, Kawaoka Y, Morikawa S, Yokosawa H, Yasuda J. 2007.  
709 Interaction of Tsg101 with Marburg virus VP40 depends on the PPPY motif, but  
710 not the PT/SAP motif as in the case of Ebola virus, and Tsg101 plays a critical role  
711 in the budding of Marburg virus-like particles induced by VP40, NP, and GP. *J Virol*  
712 81:4895-9.
- 713 45. Ernkvist M, Aase K, Ukomadu C, Wohlschlegel J, Blackman R, Veitonmaki N, Bratt  
714 A, Dutta A, Holmgren L. 2006. p130-angiomotin associates to actin and controls  
715 endothelial cell shape. *FEBS J* 273:2000-11.
- 716 46. Paramasivam M, Sarkeshik A, Yates JR, 3rd, Fernandes MJ, McCollum D. 2011.  
717 Angiomotin family proteins are novel activators of the LATS2 kinase tumor  
718 suppressor. *Mol Biol Cell* 22:3725-33.
- 719 47. Chan SW, Lim CJ, Guo F, Tan I, Leung T, Hong W. 2013. Actin-binding and cell  
720 proliferation activities of angiomotin family members are regulated by Hippo  
721 pathway-mediated phosphorylation. *J Biol Chem* 288:37296-307.
- 722 48. Mana-Capelli S, Paramasivam M, Dutta S, McCollum D. 2014. Angiomotins link F-  
723 actin architecture to Hippo pathway signaling. *25:1676-1685*.
- 724 49. Mercenne G, Alam SL, Ariei J, Lalonde MS, Sundquist WI. 2015. Angiomotin  
725 functions in HIV-1 assembly and budding. *Elife* 4.



- 726 50. Ray G, Schmitt PT, Schmitt AP. 2019. Angiotensin-Like 1 Links Paramyxovirus M  
727 Proteins to NEDD4 Family Ubiquitin Ligases. *Viruses* 11.
- 728 51. Watanabe A, Hippo Y, Taniguchi H, Iwanari H, Yashiro M, Hirakawa K, Kodama  
729 T, Aburatani H. 2003. An opposing view on WWOX protein function as a tumor  
730 suppressor. *Cancer Res* 63:8629-33.
- 731 52. Pleet ML, Erickson J, DeMarino C, Barclay RA, Cowen M, Lepene B, Liang J, Kuhn  
732 JH, Prugar L, Stonier SW, Dye JM, Zhou W, Liotta LA, Aman MJ, Kashanchi F.  
733 2018. Ebola Virus VP40 Modulates Cell Cycle and Biogenesis of Extracellular  
734 Vesicles. *J Infect Dis* 218:S365-S387.
- 735 53. Nanbo A, Watanabe S, Halfmann P, Kawaoka Y. 2013. The spatio-temporal  
736 distribution dynamics of Ebola virus proteins and RNA in infected cells. *Sci Rep*  
737 3:1206.
- 738 54. Björndal AS, Szekely L, Elgh F. 2003. Ebola virus infection inversely correlates  
739 with the overall expression levels of promyelocytic leukaemia (PML) protein in  
740 cultured cells. *BMC Microbiol* 3:6.
- 741 55. Wang M, Li Y, Wu M, Wang W, Gong B, Wang Y. 2014. WWOX suppresses cell  
742 growth and induces cell apoptosis via inhibition of P38 nuclear translocation in  
743 cholangiocarcinoma. *Cell Physiol Biochem* 34:1711-22.
- 744 56. Del Mare S, Salah Z, Aqeilan RI. 2009. WWOX: its genomics, partners, and  
745 functions. *J Cell Biochem* 108:737-45.
- 746 57. Salah Z, Aqeilan R, Huebner K. 2010. WWOX gene and gene product: tumor  
747 suppression through specific protein interactions. *Future Oncol* 6:249-59.

- 748 58. Chang JY, He RY, Lin HP, Hsu LJ, Lai FJ, Hong Q, Chen SJ, Chang NS. 2010.  
749 Signaling from membrane receptors to tumor suppressor WW domain-containing  
750 oxidoreductase. *Exp Biol Med (Maywood)* 235:796-804.
- 751 59. Hussain T, Lee J, Abba MC, Chen J, Aldaz CM. 2018. Delineating WWOX Protein  
752 Interactome by Tandem Affinity Purification-Mass Spectrometry: Identification of  
753 Top Interactors and Key Metabolic Pathways Involved. *Front Oncol* 8:591.  
754

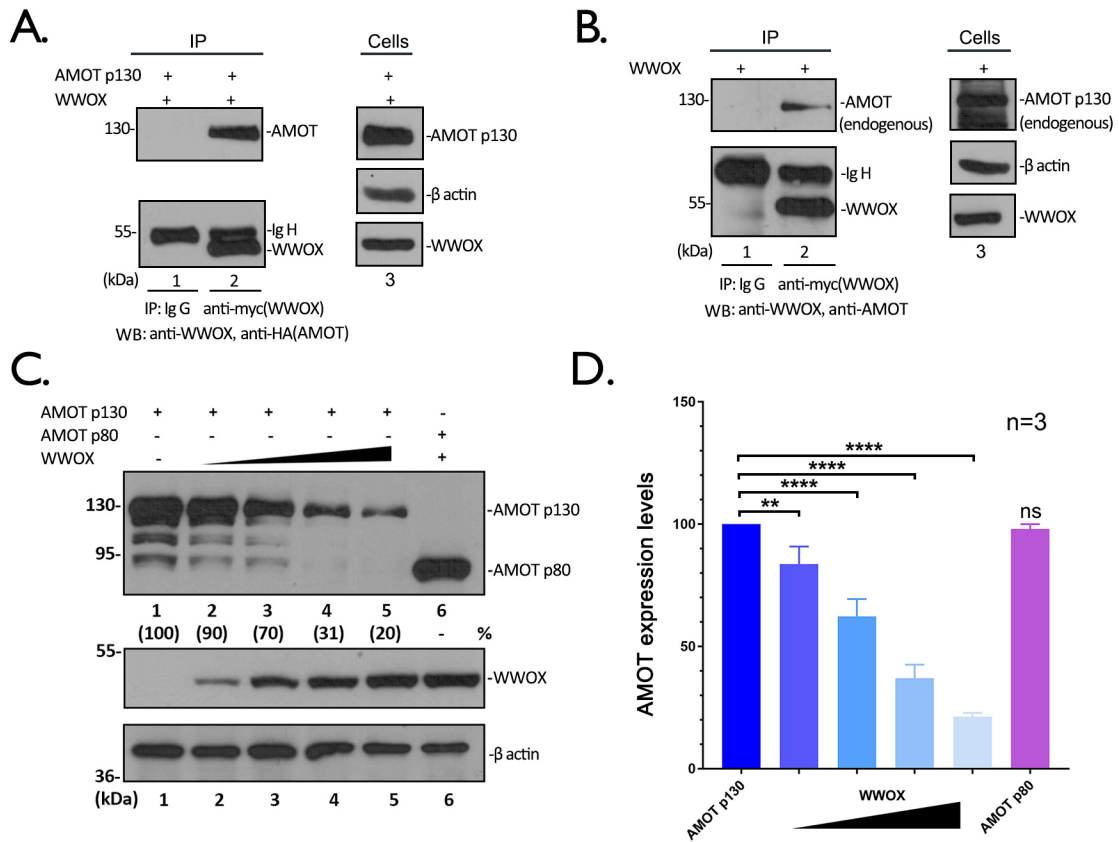

**A.**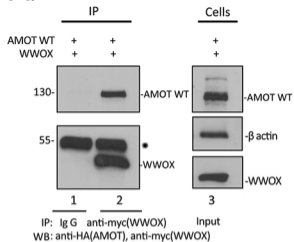**B.**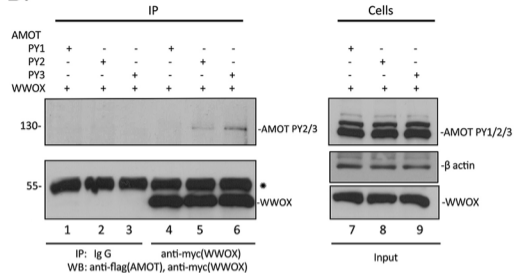**C.**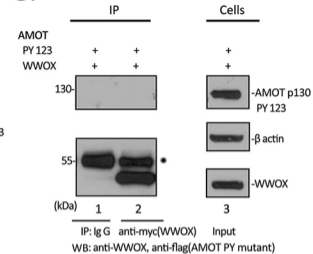**D.**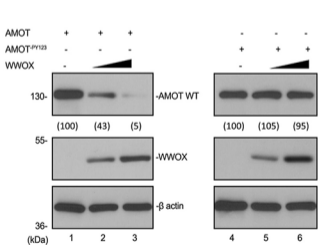**E.**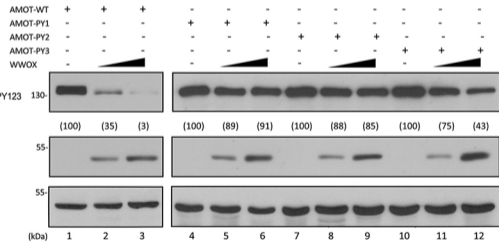**F.**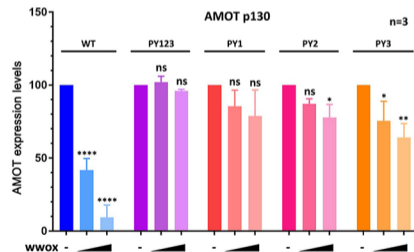**G.**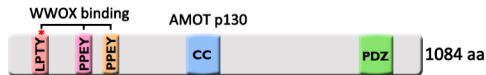

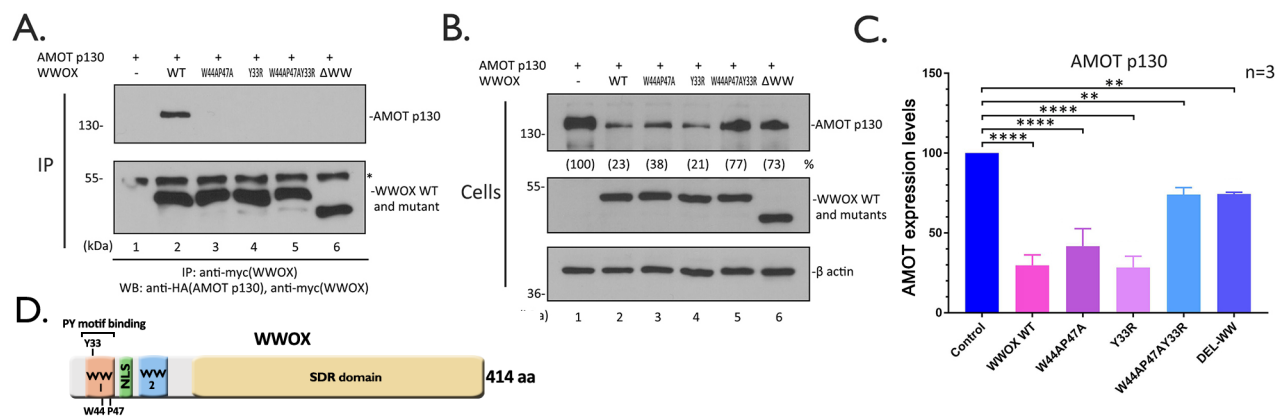

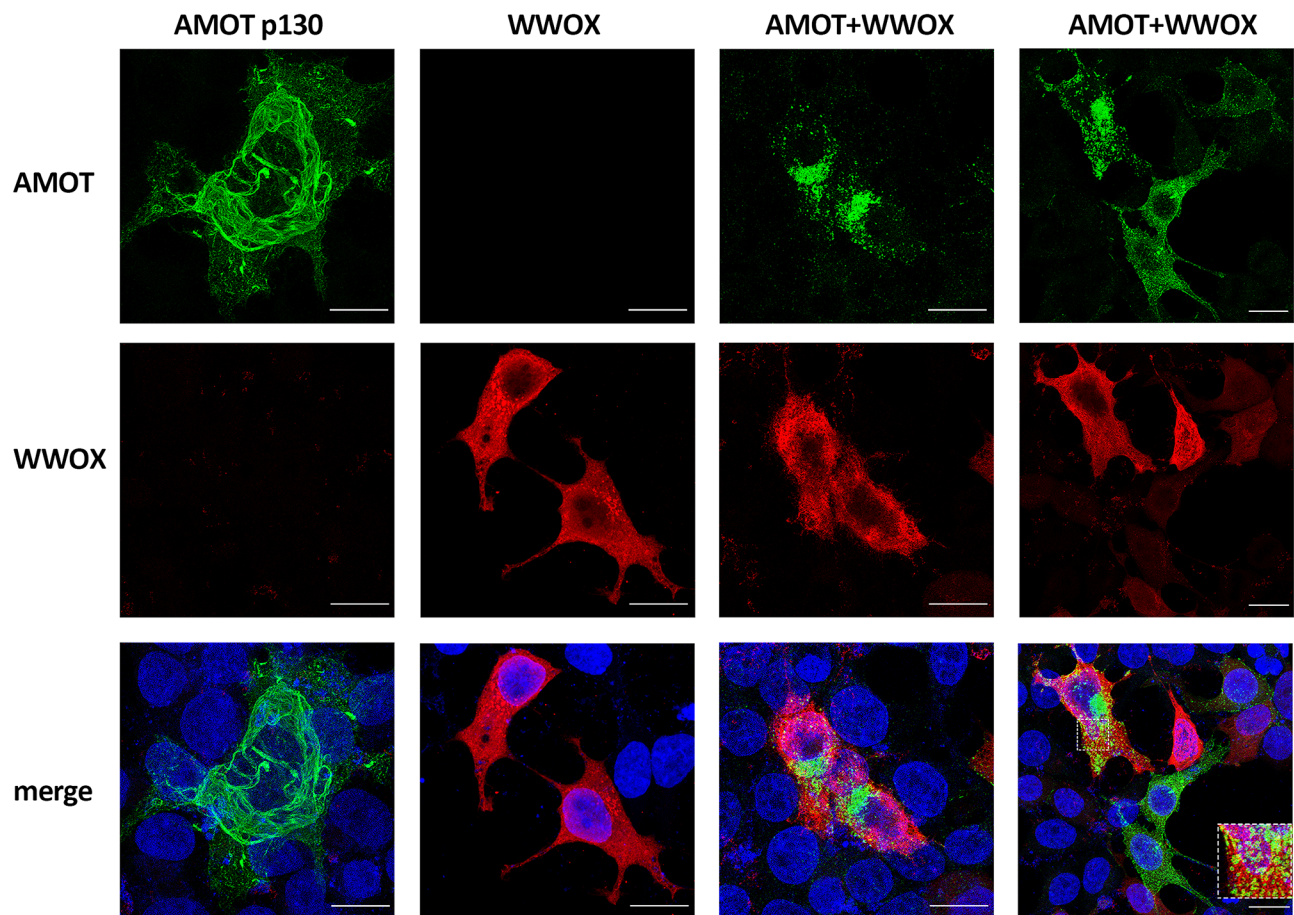

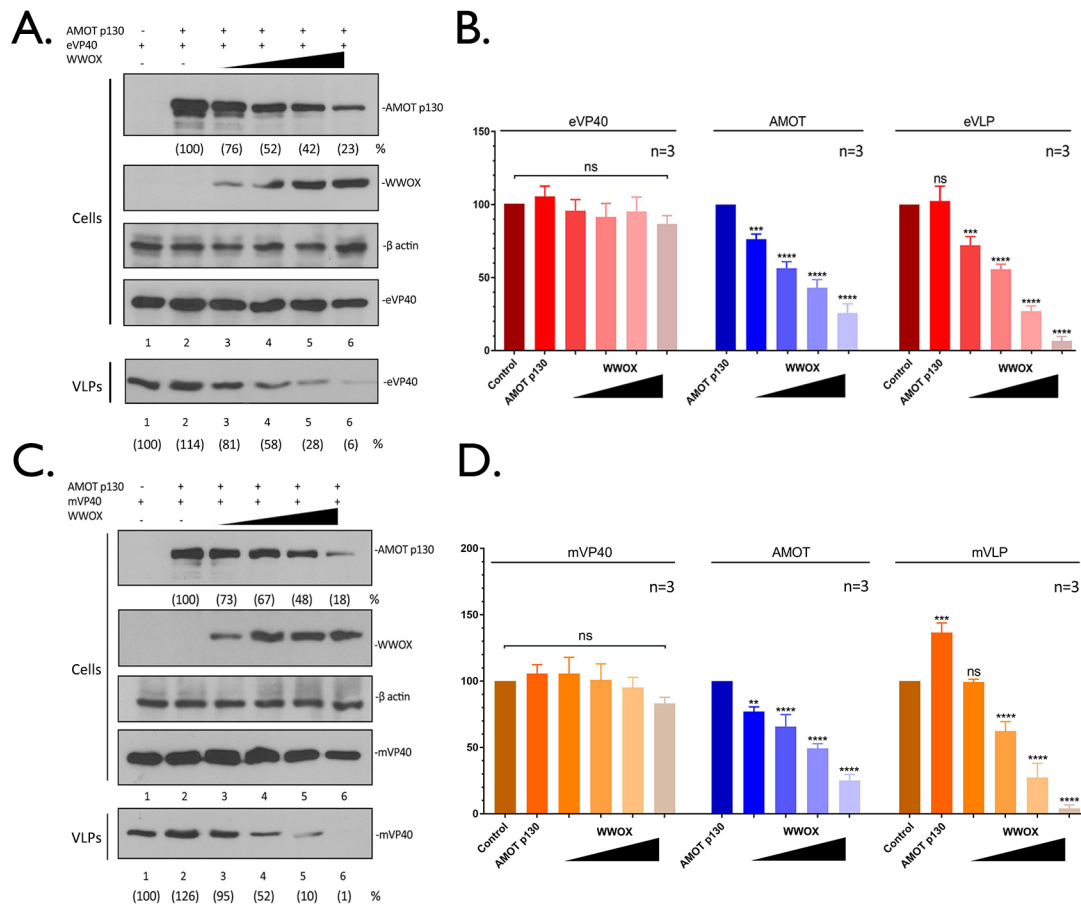

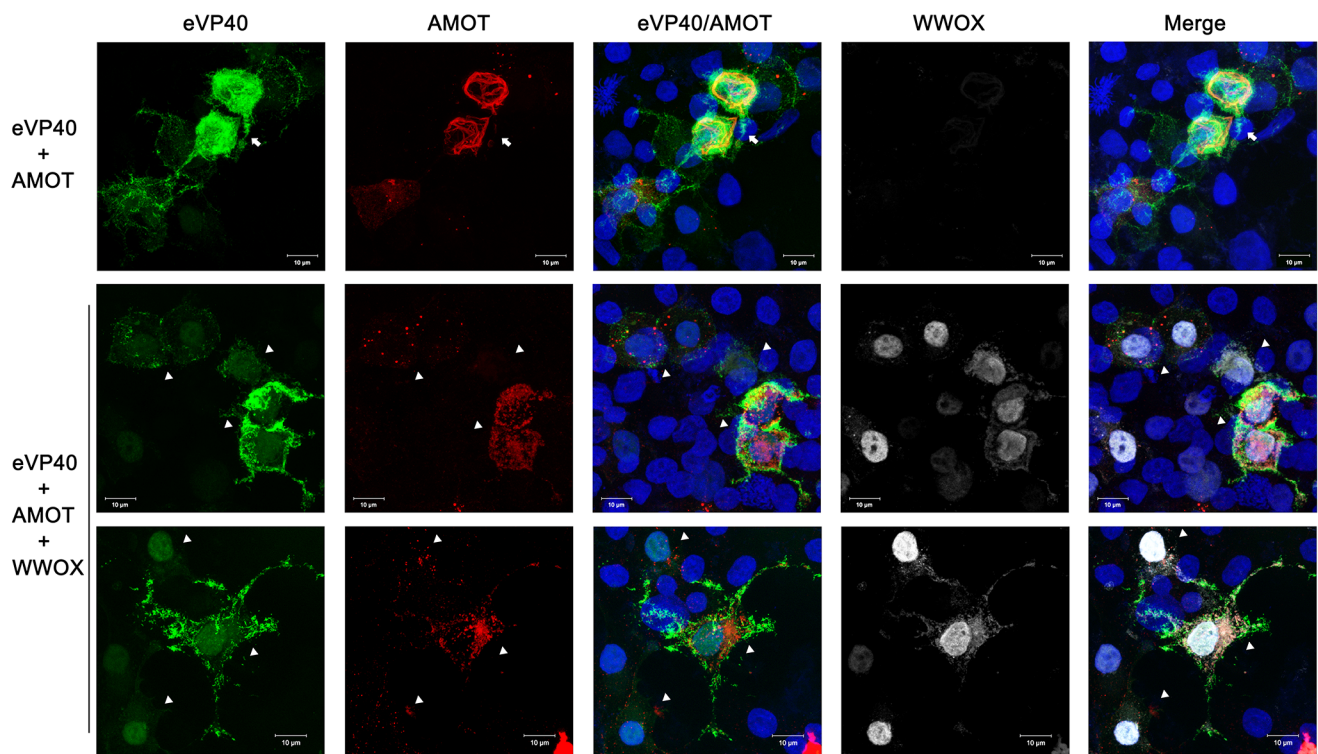



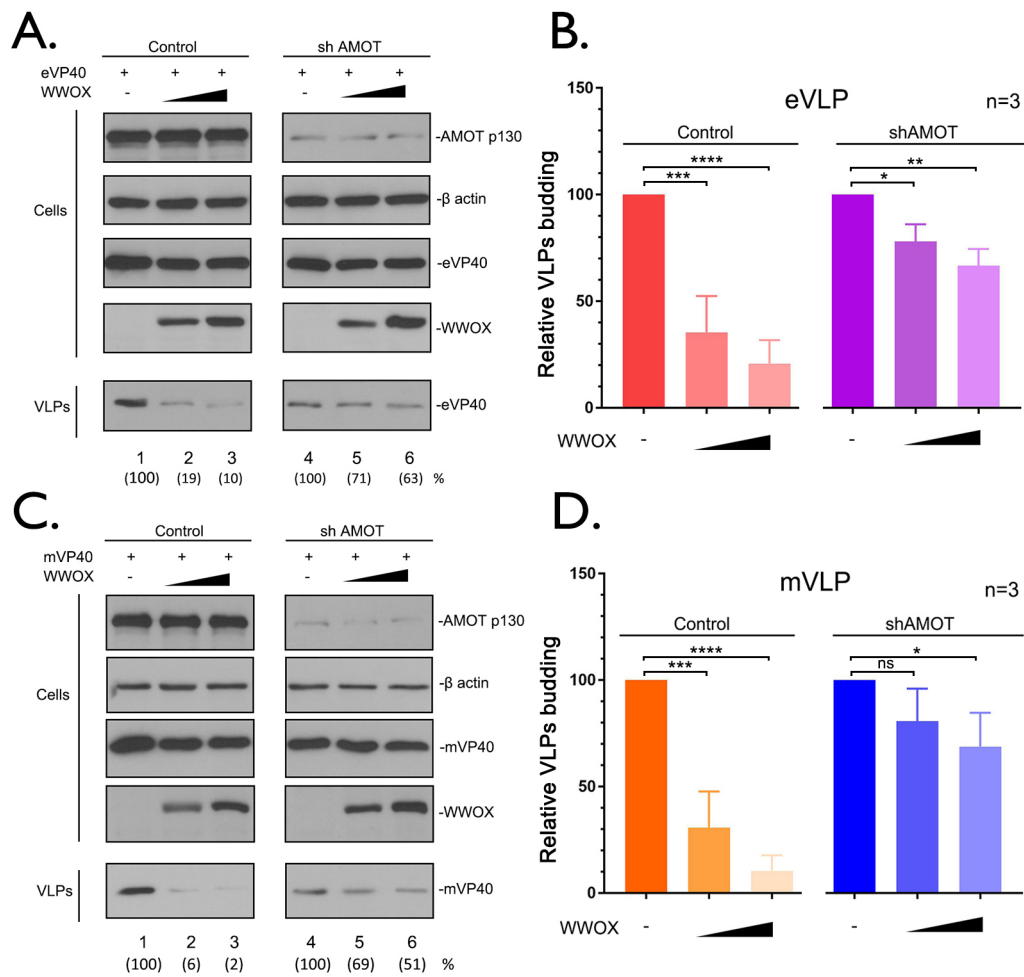

**A.**

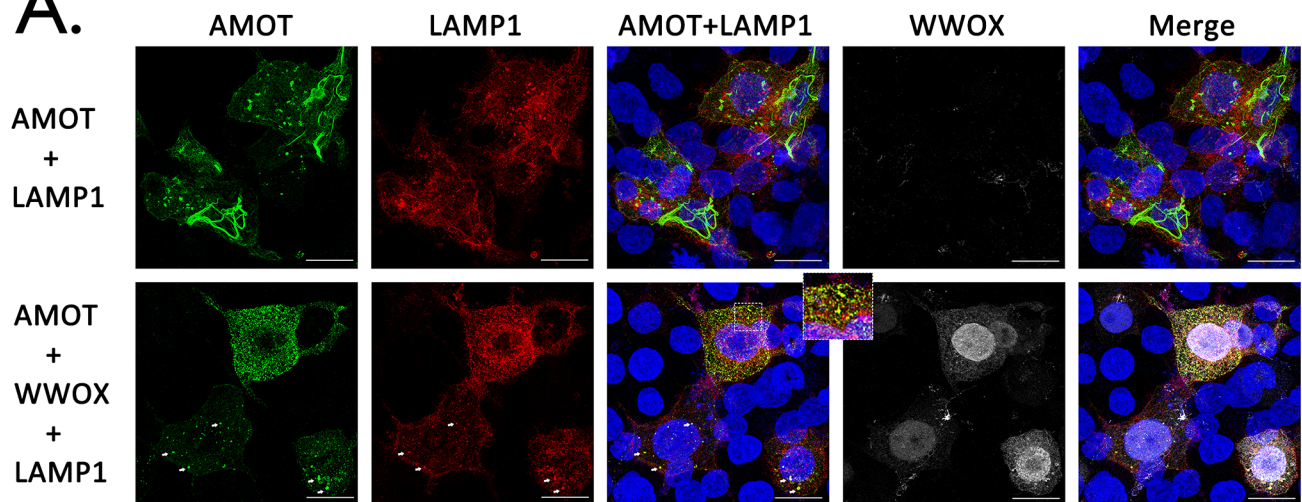

**B.**

AMOT+Control

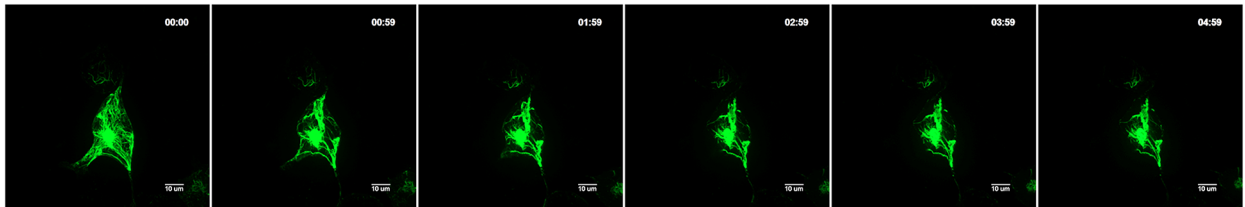

AMOT+WWOX

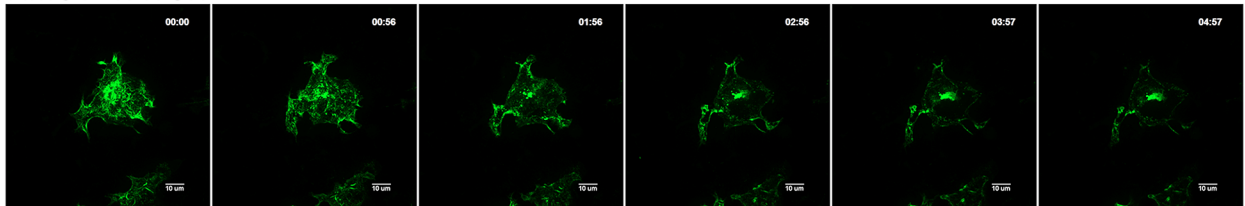

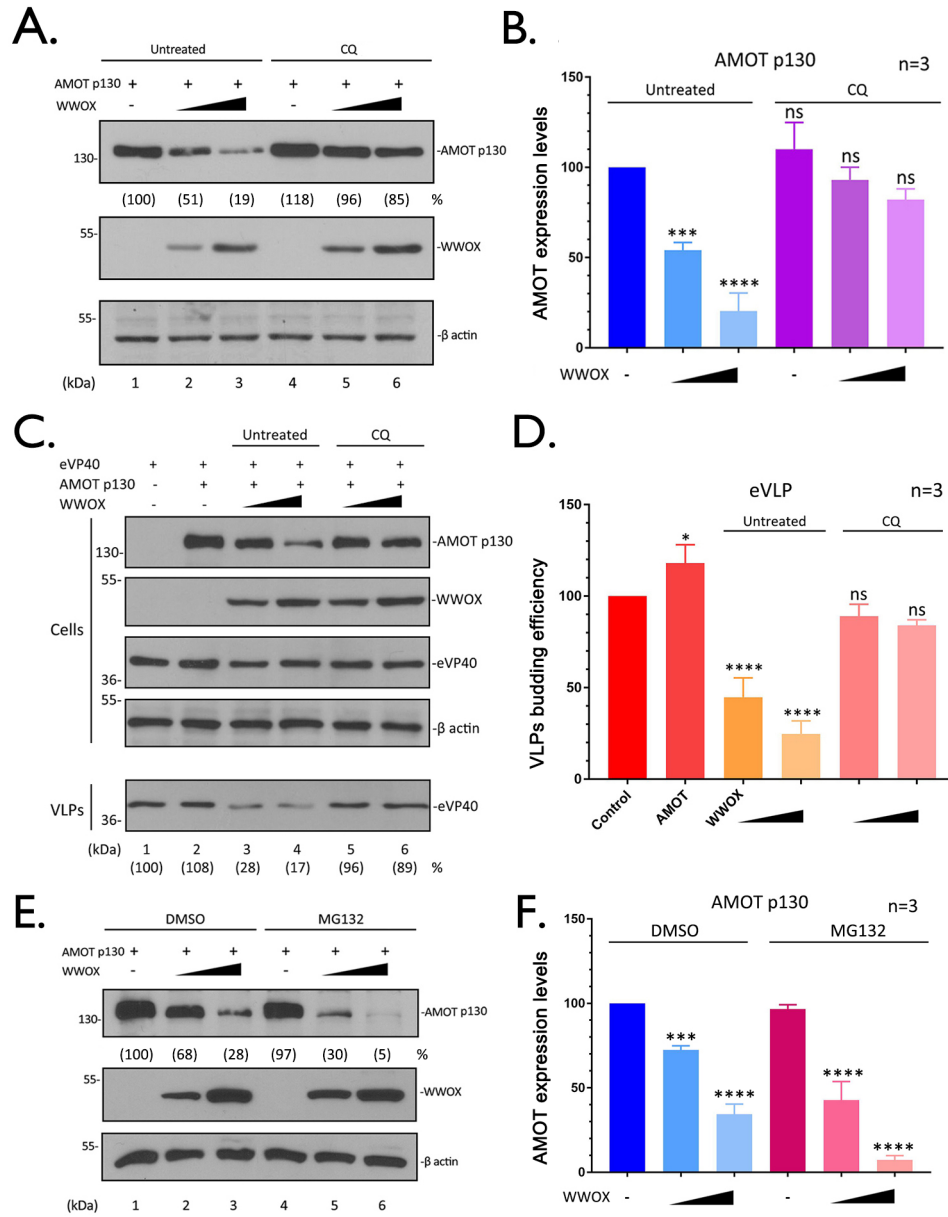

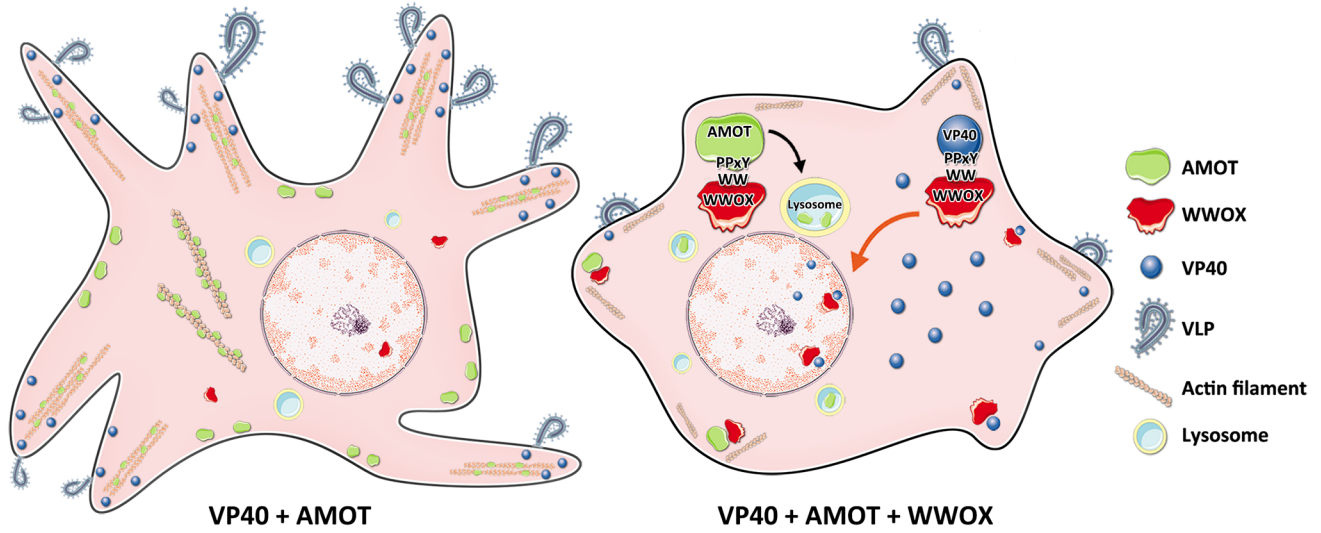

Source: https://www.biorxiv.org/content/biorxiv/early/2021/11/20/2021.11.19.469355.full.pdf
